# Supplementary material for: Impact of 1,6-hexanediol on Schizosaccharomyces pombe genome stability
Source: PubMed Central journal article supplement (PMC10411564; doi:10.1093/g3journal/jkad123), 2023-06-07
Supplement: jkad123_supplementary_data.pdf [file jkad123_supplementary_data.pdf]

### GFP-Nhp2

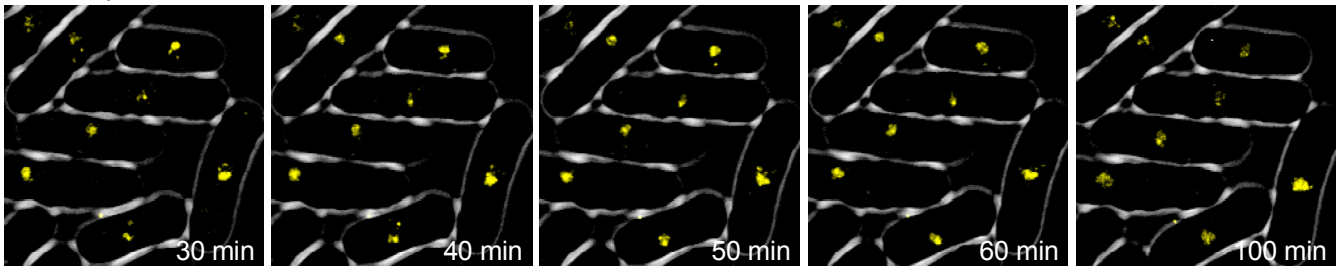

### Gar2-mCherry

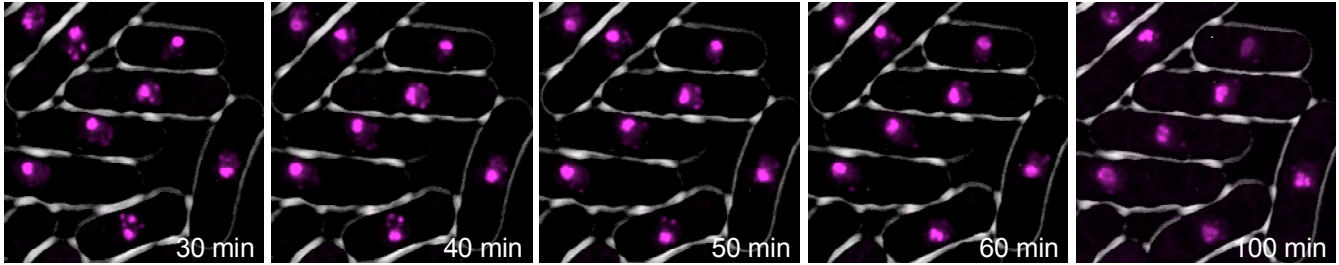

### Composite

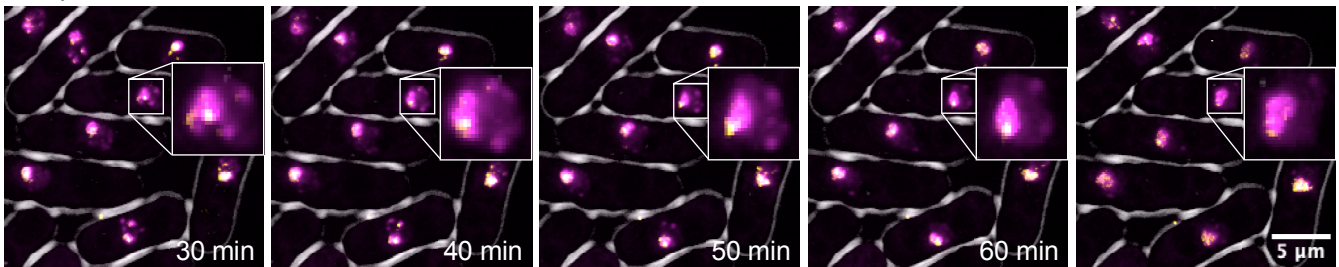

### Supplemental Figure 1. Acute recovery from 5% 1,6-hexanediol

Cells were grown for 2 hours in 5% 1,6-hexanediol, washed two times with 1x PBS, and plated directly on nutrient pads. Images were taken every 10 minutes. GFP-Nhp2 is shown in false color as yellow and Gar2-mCherry and Sad1-mCherry are shown in magenta for ease of viewing.

### GFP-Nhp2

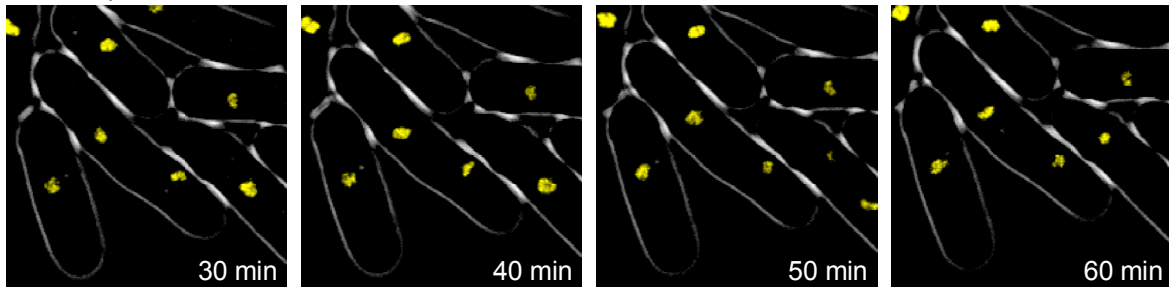

### Gar2-mCherry

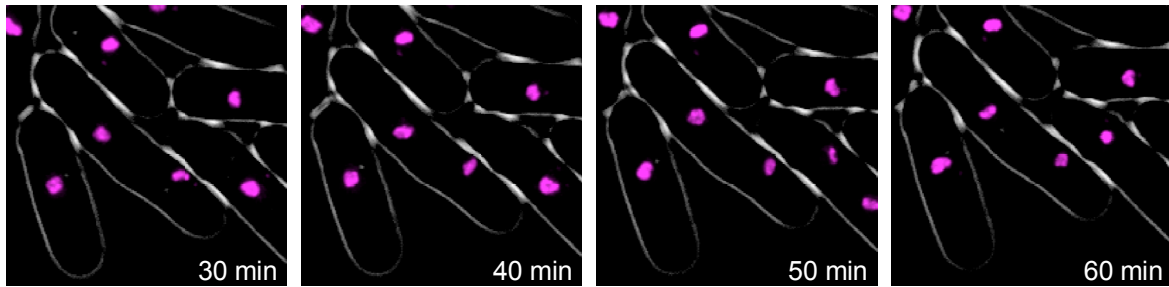

### Composite

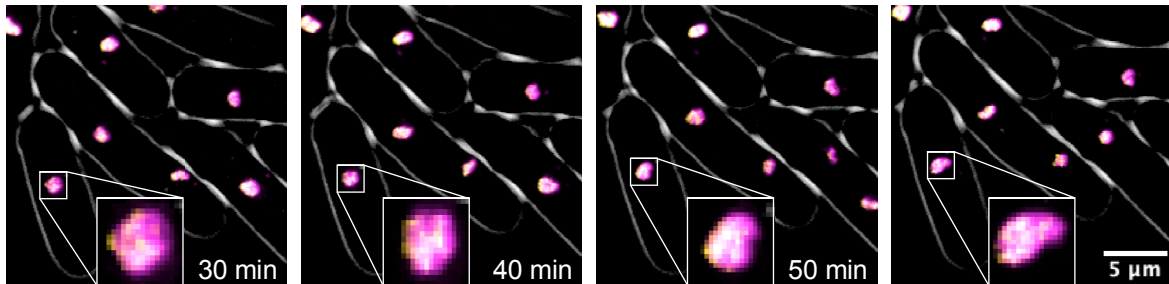

### Supplemental Figure 2. Acute recovery from 2.5% 1,6-hexanediol

Cells were grown for 2 hours in 2.5% 1,6-hexanediol, washed two times with 1x PBS, and plated directly on nutrient pads. Images were taken every 10 minutes. GFP-Nhp2 is shown in false color as yellow and Gar2-mCherry and Sad1-mCherry are shown in magenta for ease of viewing.

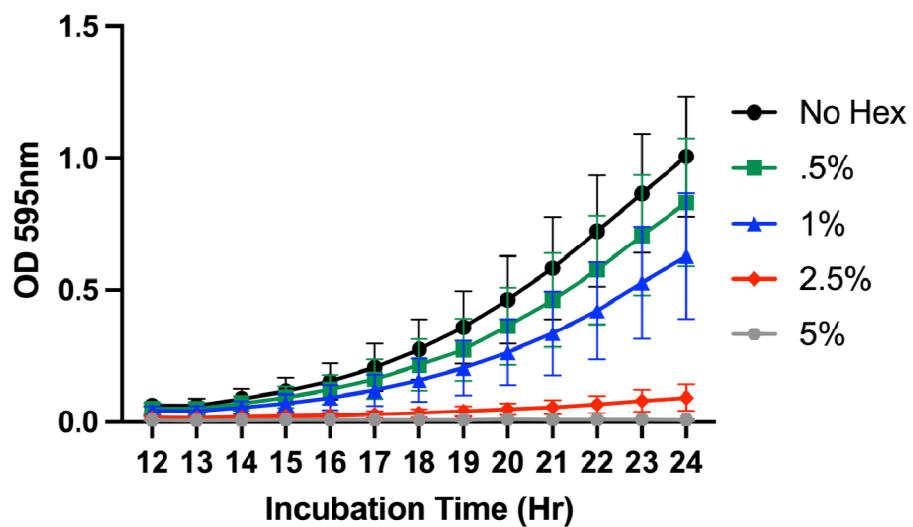

**Supplemental Figure 3. *S. pombe* raw growth rate in 1,6-Hexanediol**  
Growth rate of *S. pombe* cells in varying concentrations of 1,6-hexanediol. OD was measured at 595nm and raw values were plotted and error bars represent SD, N=6.
